# Supplementary material for: A transient role of the ciliary gene Inpp5e in controlling direct versus indirect neurogenesis in cortical development
Source: eLife. 2020 Aug 25;9:e58162. doi: 10.7554/eLife.58162 (PMC7481005; doi:10.7554/eLife.58162)
Supplement: Supplementary file 1. [file elife-58162-supp1.xlsx]

## Sheet: Fig. 1
	experiment	marker	mean	lower 95% CI	upper 95% CI	number	test	p value		t statistic	degree of freedom		Shapiro-Wilk Normality test	p value		F test to	F, DFn, Dfd	P value	Significantly
																compare variances			different?
	C	Pax6/PCNA medial
		control	93.08	89.3	96.86	4	unpaired t-test	0.9403	Two-tailed	0.07812	6			0.8554			3.799, 3, 3	0.302	No
		Inpp5eD/D	93.29	85.91	100.7	4								0.7469
	D	Pax6/PCNA lateral
		control	83.16	70.84	95.48	4	unpaired t-test	0.2101	Two-tailed	1.403	6			0.6008			7.335, 3, 3	0.1359	No
		Inpp5eD/D	88.95	84.4	93.5	4								0.323
	G	Tbr2/PCNA medial
		control	8.279	5.963	10.59	4	unpaired t-test	0.1473	Two-tailed	1.663	6			0.2935			1.623, 3, 3	0.7003	No
		Inpp5eD/D	10.24	7.289	13.19	4								0.4505
	H	Tbr2/PCNA lateral
		control	35.98	26.92	45.05	5	unpaired t-test	0.0146	Two-tailed	3.103	8			0.4535			3.551, 4, 4	0.2473	No
		Inpp5eD/D	24.52	19.71	29.33	5								0.6229
	K	Tbr1/DAPI medial
		control	8.385	5.111	11.66	4	unpaired t-test	0.5975	Two-tailed	0.5573	6			0.8183			4.485, 3, 3	0.2493	No
		Inpp5eD/D	9.019	7.473	10.56	4								0.4102
	L	Tbr1/DAPI lateral
		control	14.24	11.29	17.2	4	unpaired t-test	0.0019	Two-tailed	5.282	6			0.64			1.202, 3, 3	0.8835	No
		Inpp5eD/D	20.89	18.19	23.59	4								0.3566

## Sheet: Fig. 2
	experiment	marker	mean	lower 95% CI	upper 95% CI	number	test	p value		t statistic	degree of freedom		Shapiro-Wilk Normality test	p value		F test to	F, DFn, Dfd	P value	Significantly
																compare variances			different?
	C	Pax6/PCNA medial
		control	79.7	69.76	89.64	4	unpaired t-test	0.4852	Two-tailed	0.7436	6			0.1672			6.009, 3, 3	0.1749	No
		Inpp5eD/D	82.21	78.15	86.26	4								0.3128
	D	Pax6/PCNA lateral
		control	77.85	68.39	87.31	4	unpaired t-test	0.4786	Two-tailed	0.7555	6			0.905			1.024, 3, 3	0.9851	No
		Inpp5eD/D	74.69	65.34	84.05	4								0.088
	G	Tbr2/PCNA medial
		control	43	35.3	50.71	4	Mann Whitney	0.0286	Two-tailed	Mann-Whitney U = 0				0.4886
		Inpp5eD/D	20.12	8.499	31.75	4								0.0148
	H	Tbr2/PCNA lateral
		control	49.35	40.31	58.4	4	unpaired t-test	0.6559	Two-tailed	0.4686	6			0.2199			13.41, 3, 3	0.0607	No
		Inpp5eD/D	47.97	45.5	50.44	4								0.3378
	K	Tbr1+Ctip2+/DAPI medial
		control	20.26	14.56	25.97	4	unpaired t-test	0.2066	Two-tailed	1.416	6			0.5573			1.286, 3, 3	0.8413	No
		Inpp5eD/D	16.88	11.84	21.91	4								0.0937
	L	Tbr1+Ctip2+/DAPI lateral
		control	20.85	16.79	24.91	4	unpaired t-test	0.2288	Two-tailed	1.34	6			0.3365			2.123, 3, 3	0.5522	No
		Inpp5eD/D	17.83	11.91	23.74	4								0.279
	M	Ctip2+Tbr1-/DAPI medial
		control	6.933	4.374	9.491	4	unpaired t-test	0.0069	Two-tailed	4.022	6			0.7876			8.211, 3, 3	0.1174	No
		Inpp5eD/D	3.508	2.615	4.4	4								0.1511
	N	Ctip2+Tbr1-/DAPI lateral
		control	2.313	0.9947	3.63	4	unpaired t-test	0.0074	Two-tailed	3.97	6			0.1686			3.328, 3, 3	0.3498	No
		Inpp5eD/D	5.733	3.329	8.136	4								0.9976

## Sheet: Fig. 3
	cell cycle exit Kerstin
experiment	marker	mean	lower 95% CI	upper 95% CI	number	test	p value		t statistic	degree of freedom		Shapiro-Wilk Normality test	p value		F test to	F, DFn, Dfd	P value	Significantly
															compare variances			different?
C	Tbr2+BrdU+/BrdU+ cells E12.5
	control	33.23	30.6	35.86	4	unpaired t-test	0.0059	two-tailed	4.17	6			0.3784			1.254, 3, 3	0.8569	No
	Inpp5eD/D	28.06	25.11	31	4								0.3047
F	Tbr1+BrdU+/BrdU+ cells E12.5
	control	14.46	12.74	16.18	4	unpaired t-test	0.0134	two-tailed	3.462	6			0.4283			8.852, 3, 3	0.1064	No
	Inpp5eD/D	20.32	15.21	25.43	4								0.1027

## Sheet: Fig. 4
	experiment	marker	mean	lower 95% CI	upper 95% CI	number	test	p value		t statistic	degree of freedom		Shapiro-Wilk Normality test	p value		F test to	F, DFn, Dfd	P value	Significantly
																compare variances			different?
	M	Tbr1+/Ctip2+Tbr1+Satb2+, rostrolateral
		control	23.07	21.97	24.16	4	unpaired t-test	0.0024	Two-tailed	5.029	6			0.9712			1.040, 3, 3	0.9752	No
		Inpp5eD/D	20.65	19.58	21.72	4								0.213
	N	Ctip2+/Ctip2+Tbr1+Satb2+, rostrolateral
		control	6.553	5.545	7.56	4	unpaired t-test	0.0034	Two-tailed	4.689	6			0.8586			1.883, 3, 3	0.6163	No
		Inpp5eD/D	9.073	7.69	10.45	4								0.7873
	O	Satb2+/Ctip2+Tbr1+Satb2+, rostrolateral
		control	70.38	69.42	71.34	4	unpaired t-test	0.7621	Two-tailed	0.3169	6			0.8927			5.287, 3, 3	0.2046	No
		Inpp5eD/D	70.62	68.41	72.83	4								0.2524
	V	Tbr1+/Ctip2+Tbr1+Satb2+, rostromedial
		control	27.36	23.22	31.51	4	Mann Whitney	0.4857	Two-tailed	Mann-Whitney U = 5
		Inpp5eD/D	29.94	26.02	33.87	4
	W	Ctip2+/Ctip2+Tbr1+Satb2+, rostromedial
		control	6.69	5.46	7.92	4	Mann Whitney	0.2	Two-tailed	Mann-Whitney U = 3
		Inpp5eD/D	9.503	2.548	16.46	4
	X	Satb2+/Ctip2+Tbr1+Satb2+, rostromedial
		control	65.95	61.48	70.41	4	unpaired t-test	0.181	Two-tailed	1.513	6						5.448, 3, 3	0.1974	No
		Inpp5eD/D	60.56	50.13	70.98	4

## Sheet: Fig. 5
	experiment	marker	mean	lower 95% CI	upper 95% CI	number	test	p value		t statistic	degree of freedom		Shapiro-Wilk Normality test	p value		F test to	F, DFn, Dfd	P value	Significantly
																compare variances			different?
	C	Tbr2/PCNA
		control	20.46	18.05	22.86	4	unpaired t-test	0.0031	Two-tailed	4.782	6			0.227			1.583, 3, 3	0.7152	No
		Tctn2D/D	15.85	13.93	17.76	4								0.2358
	F	Tbr1/DAPI
		control	12.95	10.19	15.71	4	unpaired t-test	0.0008	Two-tailed	6.201	6			0.5613			7.917, 3, 3	0.1231	No
		Tctn2D/D	18.66	17.68	19.64	4								0.7638

## Sheet: Fig. 7
experiment	marker	mean	lower 95% CI	upper 95% CI	number	test	p value		t statistic	degree of freedom	Shapiro-Wilk	p value		F test to	F, DFn, Dfd	P value	Significantly
											Normality test			compare variances			different?
	Gli3 Western blot
B	control	12.22	6.81	17.62	4	unpaired t-test	0.1955	Two-tailed	1.457	6		0.3074			1.128, 3, 3	0.9233	No
	Inpp5eD/D	15.61	10.52	20.7	4							0.6951
C	control	29.64	20.76	38.52	4	unpaired t-test	0.0354	Two-tailed	2.704	6		0.3779			2.538, 3, 3	0.4645	No
	Inpp5eD/D	20.74	15.16	26.31	4							0.784
D	control	2.484	1.988	2.98	4	unpaired t-test	0.0005	Two-tailed	6.76	6		0.8071			5.737, 3, 3	0.1853	No
	Inpp5eD/D	1.342	1.134	1.549	4							0.6117
							Shapiro-Wilk		normal
experiment	marker	mean	lower 95% CI	upper 95% CI	number		Normality test	p value	distribution		Brown-Forsythe test			ANOVA			Tukey's multiple comparisons test	Mean Diff.	95% CI of diff.	Significant?	Summary	Adjusted P Value	q	DF
I	Tbr1+Ctip2+/DAPI medial
											F (DFn, DFd)	0.5080 (2, 12)		DF	12		Control vs. Inpp5e/	-6.461	-9.364 to -3.558	Yes	***	0.0002	8.397	12
	control	14.77	12.78	16.76	6			0.2204	Yes		P value	0.6141		F (DFn, DFd)	F (2, 12) = 29.90		Control vs. Inpp5e/; Gli3699/+	1.99	-0.7335 to 4.713	No	ns	0.1676	2.757	12
	Inpp5eD/D	21.23	18.93	23.53	4			0.9161	Yes		P value summary	ns		p value	< 0.0001		Inpp5e/ vs. Inpp5e/; Gli3699/+	8.451	5.434 to 11.47	Yes	****	< 0.0001	10.57	12
	Inpp5eD/D;Gli3D699/+	12.78	10.83	14.73	5			0.9615	Yes		Significantly different standard deviations? (P < 0.05)	No		P value summary	****
L	Tbr2/PCNA lateral
	control	26.53	23.39	29.66	6			0.7585	Yes		F (DFn, DFd)	1.537 (2, 12)		DF	12		Control vs. Inpp5e/	8.268	3.087 to 13.45	Yes	**	0.0029	6.021	12
	Inpp5eD/D	18.26	16.6	19.91	4			0.7986	Yes		P value	0.2545		F (DFn, DFd)	F (2, 12) = 9.283		Control vs. Inpp5e/; Gli3699/+	2.213	-2.647 to 7.073	No	ns	0.4673	1.718	12
	Inpp5eD/D;Gli3D699/+	24.31	19.47	29.15	5			0.3872	Yes		P value summary	ns		p value	0.0037		Inpp5e/ vs. Inpp5e/; Gli3699/+	-6.055	-11.44 to -0.6706	Yes	*	0.0277	4.243	12
											Significantly different standard deviations? (P < 0.05)	No		P value summary	**

## Sheet: Fig. 8
							Shapiro-Wilk		normal
I	Tbr1+Ctip2+/DAPI medial	mean	lower 95% CI	upper 95% CI	number		Normality test	p value	distribution		Brown-Forsythe test			ANOVA			Tukey's multiple comparisons test	Mean Diff.	95% CI of diff.	Significant?	Summary	Adjusted P Value	q	DF
	control	14.88	13.81	15.95	9			0.067	Yes		F (DFn, DFd)	3.158 (3, 18)		DF	18		control vs. Inpp5e/	-0.7861	-2.930 to 1.357	No	ns	0.7308	1.466	18
	Inpp5eD/D	15.67	15.14	16.19	4			0.7918	Yes		P value	0.0501		F (DFn, DFd)	F (3, 18) = 2.475		control vs. Inpp5e/; Gli3699/+	1.417	-0.5728 to 3.407	No	ns	0.2201	2.846	18
	Inpp5eD/D;Gli3D699/+	13.46	12.55	14.37	5			0.447	Yes		P value summary	ns		p value	0.0945		control vs. Inpp5e/; Gli3699/699	-0.01611	-2.160 to 2.127	No	ns	> 0.9999	0.03004	18
	Inpp5eD/D;Gli3D699/D699	14.9	11.89	17.9	4			0.9431	Yes		Significantly different standard deviations? (P < 0.05)	No		P value summary	ns		Inpp5e/ vs. Inpp5e/; Gli3699/+	2.203	-0.1899 to 4.596	No	ns	0.0774	3.68	18
																	Inpp5e/ vs. Inpp5e/; Gli3699/699	0.77	-1.752 to 3.292	No	ns	0.8237	1.22	18
																	Inpp5e/; Gli3699/+ vs. Inpp5e/; Gli3699/699	-1.433	-3.826 to 0.9599	No	ns	0.356	2.394	18
							Shapiro-Wilk		normal
J	Tbr1-Ctip2+/DAPI medial						Normality test	p value	distribution		Brown-Forsythe test			ANOVA			Tukey's multiple comparisons test	Mean Diff.	95% CI of diff.	Significant?	Summary	Adjusted P Value	q	DF
	control	13.23	11.86	14.59	8			0.1329	Yes		F (DFn, DFd)	1.204 (3, 18)		DF	18		control vs. Inpp5e/	8.864	6.302 to 11.43	Yes	****	< 0.0001	13.83	18
	Inpp5eD/D	4.363	3.767	4.958	4			0.6236	Yes		P value	0.3365		F (DFn, DFd)	F (3, 18) = 44.87		control vs. Inpp5e/; Gli3699/+	6.263	3.884 to 8.641	Yes	****	< 0.0001	10.53	18
	Inpp5eD/D;Gli3D699/+	6.964	5.588	8.34	5			0.9183	Yes		P value summary	ns		p value	< 0.0001		control vs. Inpp5e/; Gli3699/699	0.05667	-2.506 to 2.619	No	ns	> 0.9999	0.0884	18
	Inpp5eD/D;Gli3D699/D699	13.17	10.22	16.12	4			0.3121	Yes		Significantly different standard deviations? (P < 0.05)	No		P value summary	****		Inpp5e/ vs. Inpp5e/; Gli3699/+	-2.602	-5.462 to 0.2587	No	ns	0.0822	3.635	18
																	Inpp5e/ vs. Inpp5e/; Gli3699/699	-8.808	-11.82 to -5.793	Yes	****	< 0.0001	11.68	18
																	Inpp5e/; Gli3699/+ vs. Inpp5e/; Gli3699/699	-6.206	-9.066 to -3.346	Yes	****	< 0.0001	8.673	18
							Shapiro-Wilk		normal
K	Tbr2/PCNA medial						Normality test	p value	distribution		Brown-Forsythe test			ANOVA			Tukey's multiple comparisons test	Mean Diff.	95% CI of diff.	Significant?	Summary	Adjusted P Value	q	DF
	control	33.48	32.98	33.98	8			0.7282	Yes		F (DFn, DFd)	0.8481 (3, 16)		DF	16		control vs. Inpp5e/	11.55	9.859 to 13.23	Yes	****	< 0.0001	27.7	16
	Inpp5eD/D	21.94	20.72	23.15	4			0.3305	Yes		P value	0.4876		F (DFn, DFd)	F (3, 16) = 181.6		control vs. Inpp5e/; Gli3699/+	9.131	7.444 to 10.82	Yes	****	< 0.0001	21.9	16
	Inpp5eD/D;Gli3D699/+	24.35	22.19	26.51	4			0.4153	Yes		P value summary	ns		p value	<0.0001		control vs. Inpp5e/; Gli3699/699	0.6388	-1.048 to 2.326	No	ns	0.7042	1.532	16
	Inpp5eD/D;Gli3D699/D699	32.84	30.78	34.9	4			0.9994	Yes		Significantly different standard deviations? (P < 0.05)	No		P value summary	****		Inpp5e/ vs. Inpp5e/; Gli3699/+	-2.415	-4.363 to -0.4673	Yes	*	0.0129	5.017	16
																	Inpp5e/ vs. Inpp5e/; Gli3699/699	-10.91	-12.86 to -8.960	Yes	****	< 0.0001	22.66	16
																	Inpp5e/; Gli3699/+ vs. Inpp5e/; Gli3699/699	-8.493	-10.44 to -6.545	Yes	****	< 0.0001	17.64	16

## Sheet: SupFig. 4
	experiment	marker	mean	lower 95% CI	upper 95% CI	number	test	p value		t statistic	degree of freedom		Shapiro-Wilk	p value		F test to	F, DFn, Dfd	P value	Significantly
													Normality test			compare variances			different?
	C	pHH3 apical/PCNA E12.5 medial
		control	8.57	7.619	9.521	4	unpaired t-test	0.0415	Two-tailed	2.584	6			0.9957			1.515, 3, 3	0.7412	No
		Inpp5eD/D	7.575	6.802	8.348	4								0.3019
	D	pHH3 basal/PCNA E12.5 medial
		control	1.59	1.119	2.061	4	Mann Whitney	0.0286	Two-tailed	Mann Whitney U = 0				0.2681
		Inpp5eD/D	0.515	0.2332	0.7968	4								0.0105
	G	pHH3 apical/PCNA E12.5 lateral
		control	6.908	5.656	8.159	4	unpaired t-test	0.7958	Two-tailed	0.2706	6			0.9819			2.025, 3, 3	0.5769	No
		Inpp5eD/D	6.778	5.898	7.657	4								0.4642
	H	pHH3 basal/PCNA E12.5 lateral
		control	1.9	0.803	2.997	4	Mann Whitney	0.6571	Two-tailed	Mann Whitney U = 6				0.2249
		Inpp5eD/D	1.588	0.9324	2.243	4								0.0338
	K	pHH3 apical/PCNA E14.5 medial
		control	6.627	1.55	11.7	3	unpaired t-test	0.3666	Two-tailed	1.017	4			0.7429			2.925, 2, 2	0.5096	No
		Inpp5eD/D	8.017	5.048	10.98	3								0.4189
	L	pHH3 basal/PCNA E14.5 medial
		control	0.75	0.07928	1.421	3	unpaired t-test	0.0758	Two-tailed	2.383	4			>0.9999			3.524, 2, 2	0.4421	No
		Inpp5eD/D	1.54	0.2809	2.799	3								0.8366
	O	pHH3 apical/PCNA E14.5 lateral
		control	4.967	4.171	5.762	3	Mann Whitney	0.9	Two-tailed	Mann Whitney U = 4				0.5129
		Inpp5eD/D	5.757	2.243	9.271	3								0.0135
	P	pHH3 basal/PCNA E14.5 lateral
		control	1.313	0.655	1.972	3	unpaired t-test	0.0836	Two-tailed	2.292	4			0.9792			2.125, 2, 2	0.64	No
		Inpp5eD/D	1.933	0.9737	2.893	3								0.8428

## Sheet: SupFig. 5
experiment	cell cycle time	mean	lower 95% CI	upper 95% CI	number	test	p value		t statistic	degree of freedom		Shapiro-Wilk	p value		F test to	F, DFn, Dfd	P value	Significantly
												Normality test			compare variances			different?
A	TC
	control	13.4	12.26	14.55	4	unpaired t-test	0.7587	Two-tailed	0.3216	6			0.5527			1.549, 3, 3	0.728	No
	Inpp5eD/D	13.59	12.16	15.01	4								0.939
	TS
	control	5.15	3.78	6.52	4	unpaired t-test	0.2649	Two-tailed	1.23	6			0.1641			2.396, 3, 3	0.4918	No
	Inpp5eD/D	4.52	3.635	5.405	4								0.4298

## Sheet: SupFig. 7
									Control		Inpp5eD/D
experiment	marker	test		DF	F (DFn, DFd)	P value	test	level	Mean	N	Mean	N	Mean Diff.	95% CI of diff.	Significant?	Summary	Adjusted P Value	t	DF
G	DAPI	two way ANOVA	level	2	F (2, 6) = 16.23	0.0038	Sidak's multiple comparisons test	rostral	809.9	4	701.9	4	108.1	21.07 to 195.0	Yes	*	0.0197	4.067	6
medially	cortical thickness		genotype	1	F (1, 3) = 19.74	0.0212		medial	652.3	4	490.8	4	161.5	74.54 to 248.5	Yes	**	0.0027	6.08	6
			interaction: level x genotype	2	F (2, 6) = 1.145	0.3792		caudal	504.1	4	386	4	118.1	31.09 to 205.1	Yes	*	0.013	4.444	6
H	DAPI	two way ANOVA	level	2	F (2, 6) = 71.20	< 0.0001	Sidak's multiple comparisons test	rostral	755.9	4	686.9	4	69.06	-2.902 to 141.0	No	ns	0.0589	3.142	6
laterally	cortical thickness		genotype	1	F (1, 3) = 101.3	0.0021		medial	690.8	4	527.4	4	163.4	91.46 to 235.4	Yes	***	0.0009	7.435	6
			interaction: level x genotype	2	F (2, 6) = 4.620	0.061		caudal	481.1	4	360.6	4	120.5	48.56 to 192.5	Yes	**	0.0046	5.483	6

[truncated: 2 more sheets: SupFig. 9, SupFig. 12]
